# Supplementary material
Source: PubMed Central journal article supplement (PMC4937829)
Supplement: NIHMS785109-supplement-4.pdf [file NIHMS785109-supplement-4.pdf]

## Supplementary Table 2 Additional crystallography statistics

|                                    | Spy:Im7 A28I          | Spy:Im7 A28I          | Spy:Im7 V27I          | Spy:Im7 V27I          |
|------------------------------------|-----------------------|-----------------------|-----------------------|-----------------------|
| <b>Data collection</b>             |                       |                       |                       |                       |
| Wavelength (Å)                     | 1.90749               | 0.88554               | 1.90749               | 0.88553               |
| Space group                        | P4 <sub>1</sub> 22    | P4 <sub>1</sub> 22    | P4 <sub>1</sub> 22    | P4 <sub>1</sub> 22    |
| Cell dimensions                    |                       |                       |                       |                       |
| <i>a</i> , <i>b</i> , <i>c</i> (Å) | 43.08, 43.08, 259.8   | 43.2, 43.2, 260.6     | 42.6, 42.6, 257.1     | 42.6, 42.6, 256.8     |
| $\alpha$ , $\beta$ , $\gamma$ (°)  | 90, 90, 90            | 90, 90, 90            | 90, 90, 90            | 90, 90, 90            |
| Resolution (Å)                     | 52.97-2.70(2.83-2.70) | 30.62-2.31(2.39-2.31) | 42.60-2.91(3.08-2.91) | 28.53-2.59(2.71-2.59) |
| <i>R</i> <sub>merge</sub> (%)      | 16.8(29.7)            | 11.8(23.1)            | 5.1(17.3)             | 5.0(14)               |
| <i>I</i> / $\sigma$ ( <i>I</i> )   | 10.0(8.7)             | 14.7(9.0)             | 15.9(6.8)             | 22.6(10.5)            |
| Completeness (%)                   | 100(100)              | 100(100)              | 97.7(94.9)            | 95.2(87.2)            |
| Redundancy                         | 11.7(11.8)            | 13.4(13.2)            | 4.9(4.7)              | 7.4(7.7)              |

|                                    | Spy:Im7 E12I (crystal 2) | Spy:Im7 E12I (crystal 2) |
|------------------------------------|--------------------------|--------------------------|
| <b>Data collection</b>             |                          |                          |
| Wavelength (Å)                     | 1.90749                  | 0.88553                  |
| Space group                        | P4 <sub>1</sub> 22       | P4 <sub>1</sub> 22       |
| Cell dimensions                    |                          |                          |
| <i>a</i> , <i>b</i> , <i>c</i> (Å) | 42.8, 42.8, 257.9        | 42.9, 42.9, 258.8        |
| $\alpha$ , $\beta$ , $\gamma$ (°)  | 90, 90, 90               | 90, 90, 90               |
| Resolution (Å)                     | 64.48-2.91(3.08-2.91)    | 29.53-2.59(2.71-2.59)    |
| <i>R</i> <sub>merge</sub> (%)      | 6.1(17)                  | 5.5(19.6)                |
| <i>I</i> / $\sigma$ ( <i>I</i> )   | 20.0(10.4)               | 17.8(6.9)                |
| Completeness (%)                   | 99.8(99.6)               | 99.7(99.3)               |
| Redundancy                         | 8.2(8.1)                 | 6.0(5.5)                 |

|                                    | Spy:Im7 A13I          | Spy:Im7 A13I          | Spy:Im7 E14I          | Spy:Im7 E14I          |
|------------------------------------|-----------------------|-----------------------|-----------------------|-----------------------|
| <b>Data collection</b>             |                       |                       |                       |                       |
| Wavelength (Å)                     | 1.90748               | 0.88554               | 1.90749               | 0.88553               |
| Space group                        | P4 <sub>1</sub> 22    | P4 <sub>1</sub> 22    | P4 <sub>1</sub> 22    | P4 <sub>1</sub> 22    |
| Cell dimensions                    |                       |                       |                       |                       |
| <i>a</i> , <i>b</i> , <i>c</i> (Å) | 43.1, 43.1, 259.9     | 43.1, 43.1, 259.8     | 42.8, 42.8, 256.7     | 42.9, 42.9, 257.5     |
| $\alpha$ , $\beta$ , $\gamma$ (°)  | 90, 90, 90            | 90, 90, 90            | 90, 90, 90            | 90, 90, 90            |
| Resolution (Å)                     | 51.97-2.80(2.95-2.80) | 32.47-2.82(2.97-2.82) | 64.19-2.91(3.08-2.91) | 28.61-2.59(2.71-2.59) |
| <i>R</i> <sub>merge</sub> (%)      | 5.3(11.5)             | 5.1(11.2)             | 6.4(26.8)             | 7.0(40.1)             |
| <i>I</i> / $\sigma$ ( <i>I</i> )   | 30.6(18.5)            | 30.6(18.7)            | 18.7(6.6)             | 16.1(4.6)             |
| Completeness (%)                   | 99.9(100)             | 99.5(98.9)            | 95.2(89.6)            | 94.8(88.7)            |
| Redundancy                         | 12.6(12.6)            | 11.9(11.8)            | 8.0(8.4)              | 7.7(8.0)              |

|                                    | Spy:Im7 E12I (crystal 1) | Spy:Im7 E12I (crystal 1) | Spy:Im7 Q17I          | Spy:Im7 Q17I          |
|------------------------------------|--------------------------|--------------------------|-----------------------|-----------------------|
| <b>Data collection</b>             |                          |                          |                       |                       |
| Wavelength (Å)                     | 1.90749                  | 0.88553                  | 1.90748               | 0.88553               |
| Space group                        | P4 <sub>1</sub> 22       | P4 <sub>1</sub> 22       | P4 <sub>1</sub> 22    | P4 <sub>1</sub> 22    |
| Cell dimensions                    |                          |                          |                       |                       |
| <i>a</i> , <i>b</i> , <i>c</i> (Å) | 42.7, 42.7, 257.5        | 42.7, 42.7, 257.8        | 42.7, 42.7, 257.3     | 42.7, 42.7, 257.6     |
| $\alpha$ , $\beta$ , $\gamma$ (°)  | 90, 90, 90               | 90, 90, 90               | 90, 90, 90            | 90, 90, 90            |
| Resolution (Å)                     | 42.71-2.91(3.08-2.91)    | 29.41-2.59(2.71-2.59)    | 64.32-2.91(3.08-2.91) | 28.47-2.59(2.71-2.59) |
| <i>R</i> <sub>merge</sub> (%)      | 5.1(11.3)                | 6.2(16.5)                | 6.7(22.3)             | 5.7(38.4)             |
| <i>I</i> / $\sigma$ ( <i>I</i> )   | 24.2(14.8)               | 18.8(10.2)               | 21.0(8.3)             | 14.4(3.6)             |
| Completeness (%)                   | 90.0(92.7)               | 88.7(90.6)               | 94.7(87.7)            | 93.4(87.0)            |
| Redundancy                         | 7.3(6.8)                 | 7.7(7.1)                 | 8.0(8.6)              | 5.3(5.4)              |

|                                    | Spy:Im7 L19I (crystal 1) | Spy:Im7 L19I (crystal 1) | Spy:Im7 L19I (crystal 2) | Spy:Im7 L19I (crystal 2) |
|------------------------------------|--------------------------|--------------------------|--------------------------|--------------------------|
| <b>Data collection</b>             |                          |                          |                          |                          |
| Wavelength (Å)                     | 1.90749                  | 0.88553                  | 1.90749                  | 0.88553                  |
| Space group                        | P4 <sub>1</sub> 22       | P4 <sub>1</sub> 22       | P4 <sub>1</sub> 22       | P4 <sub>1</sub> 22       |
| Cell dimensions                    |                          |                          |                          |                          |
| <i>a</i> , <i>b</i> , <i>c</i> (Å) | 42.9, 42.9, 257.3        | 42.9, 42.9, 257.9        | 42.9, 42.9, 257.3        | 42.9, 42.9, 257.9        |
| $\alpha$ , $\beta$ , $\gamma$ (°)  | 90, 90, 90               | 90, 90, 90               | 90, 90, 90               | 90, 90, 90               |
| Resolution (Å)                     | 64.32-2.91(3.08-2.91)    | 28.62-2.59(2.71-2.59)    | 64.32-2.91(3.08-2.91)    | 30.38-2.59(2.71-2.59)    |
| <i>R</i> <sub>merge</sub> (%)      | 7.0(16.9)                | 7.4(31.0)                | 7.7(26.1)                | 10.0(71.8)               |
| <i>I</i> / $\sigma$ ( <i>I</i> )   | 19.1(10.2)               | 17.1(6.2)                | 16.7(7.1)                | 12.3(2.7)                |
| Completeness (%)                   | 100(100)                 | 95.6(96.8)               | 100(100)                 | 99.9(100)                |
| Redundancy                         | 8.5(8.5)                 | 9.2(8.8)                 | 8.4(8.6)                 | 8.0(8.2)                 |

|                                    | Spy:Im7 E21I (crystal 1) | Spy:Im7 E21I (crystal 1) | Spy:Im7 E21I (crystal 2) | Spy:Im7 E21I (crystal 2) |
|------------------------------------|--------------------------|--------------------------|--------------------------|--------------------------|
| <b>Data collection</b>             |                          |                          |                          |                          |
| Wavelength (Å)                     | 1.90749                  | 0.88553                  | 1.90749                  | 0.88553                  |
| Space group                        | P4 <sub>1</sub> 22       | P4 <sub>1</sub> 22       | P4 <sub>1</sub> 22       | P4 <sub>1</sub> 22       |
| Cell dimensions                    |                          |                          |                          |                          |
| <i>a</i> , <i>b</i> , <i>c</i> (Å) | 42.7, 42.7, 256.8        | 42.7, 42.7, 257.6        | 42.8, 42.8, 257.6        | 42.8, 42.8, 258.2        |
| $\alpha$ , $\beta$ , $\gamma$ (°)  | 90, 90, 90               | 90, 90, 90               | 90, 90, 90               | 90, 90, 90               |
| Resolution (Å)                     | 42.19-2.91(3.08-2.91)    | 30.28-2.59(2.71-2.59)    | 64.39-2.91(3.08-2.91)    | 32.27-2.59(2.71-2.59)    |
| <i>R</i> <sub>merge</sub> (%)      | 4.8(7.9)                 | 4.7(15.2)                | 6.3(13.6)                | 6.6(15.9)                |
| <i>I</i> / $\sigma$ ( <i>I</i> )   | 28.9(19.6)               | 25.6(12.6)               | 20.3(11.0)               | 19.4(10.1)               |
| Completeness (%)                   | 100(100)                 | 99.9(100)                | 99.8(99.3)               | 99.9(100)                |
| Redundancy                         | 8.6(8.7)                 | 8.8(8.9)                 | 8.1(7.9)                 | 8.6(8.5)                 |

**Supplementary Table 3 Strains and plasmids**

| Strain | Genotype or relevant characteristics                          | Source        |
|--------|---------------------------------------------------------------|---------------|
| SQ765  | MG1655 ( $F^- \lambda^- ilvG^- rfb-50 rph-1$ ), $\Delta hsdR$ | <sup>19</sup> |
| SQ1805 | SQ765, pCDFTrc-ssIm7L53AI54A, pTrc-spy                        | <sup>19</sup> |
| SQ1809 | SQ765, pCDFTrc-ssIm7L53AI54A                                  | <sup>19</sup> |
| SQ2049 | SQ765, pCDFTrc-ssIm7L53AI54A, pTrc-spy 33-130                 | This study    |
| SQ2050 | SQ765, pCDFTrc-ssIm7L53AI54A, pTrc-spy 30-130                 | This study    |
| SQ2051 | SQ765, pCDFTrc-ssIm7L53AI54A, pTrc-spy 27-130                 | This study    |
| SQ2052 | SQ765, pCDFTrc-ssIm7L53AI54A, pTrc-spy 24-130                 | This study    |
| SQ2053 | SQ765, pCDFTrc-ssIm7L53AI54A, pTrc-spy 21-130                 | This study    |

  

| Plasmid         | Relevant characteristics                                             | Source        |
|-----------------|----------------------------------------------------------------------|---------------|
| pTrc-spy        | Spy cloned into pTrc99a derived vector pssTrx                        | <sup>19</sup> |
| pTrc-spy 33-130 | Spy fragment (33-130) with native signal sequence cloned into pssTrx | This study    |
| pTrc-spy 30-130 | Spy fragment (30-130) with native signal sequence cloned into pssTrx | This study    |
| pTrc-spy 27-130 | Spy fragment (27-130) with native signal sequence cloned into pssTrx | This study    |
| pTrc-spy 24-130 | Spy fragment (24-130) with native signal sequence cloned into pssTrx | This study    |
| pTrc-spy 21-130 | Spy fragment (21-130) with native signal sequence cloned into pssTrx | This study    |
